# Supplementary material
Source: publisher site journal article supplement (https://www.spandidos-publications.com/7426/downloadSupplementary)

Figure S1. Short hairpin RNA vector information.

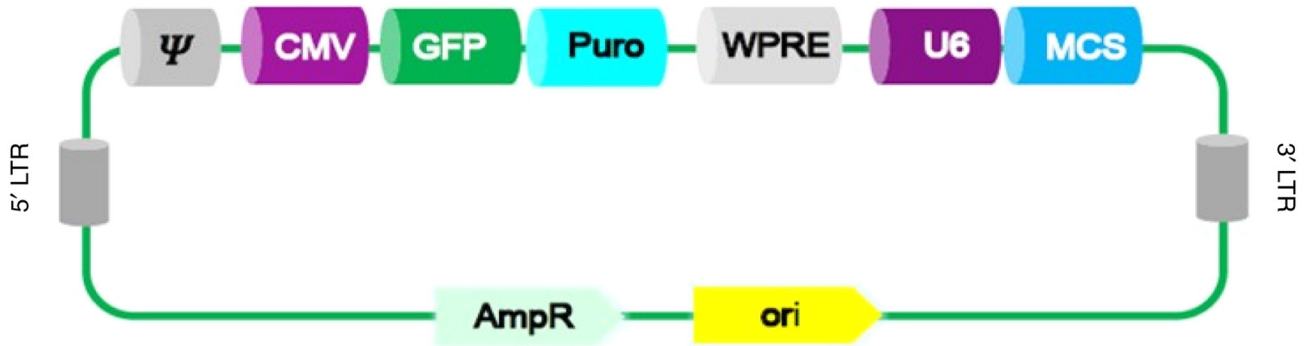

VG000088: pshLenti-U6-CMV-GFP-Puro

Figure S2. Schematic diagram of *LCMR1*-overexpression lentiviral plasmid. *LCMR1*, lung cancer metastasis-related protein 1.

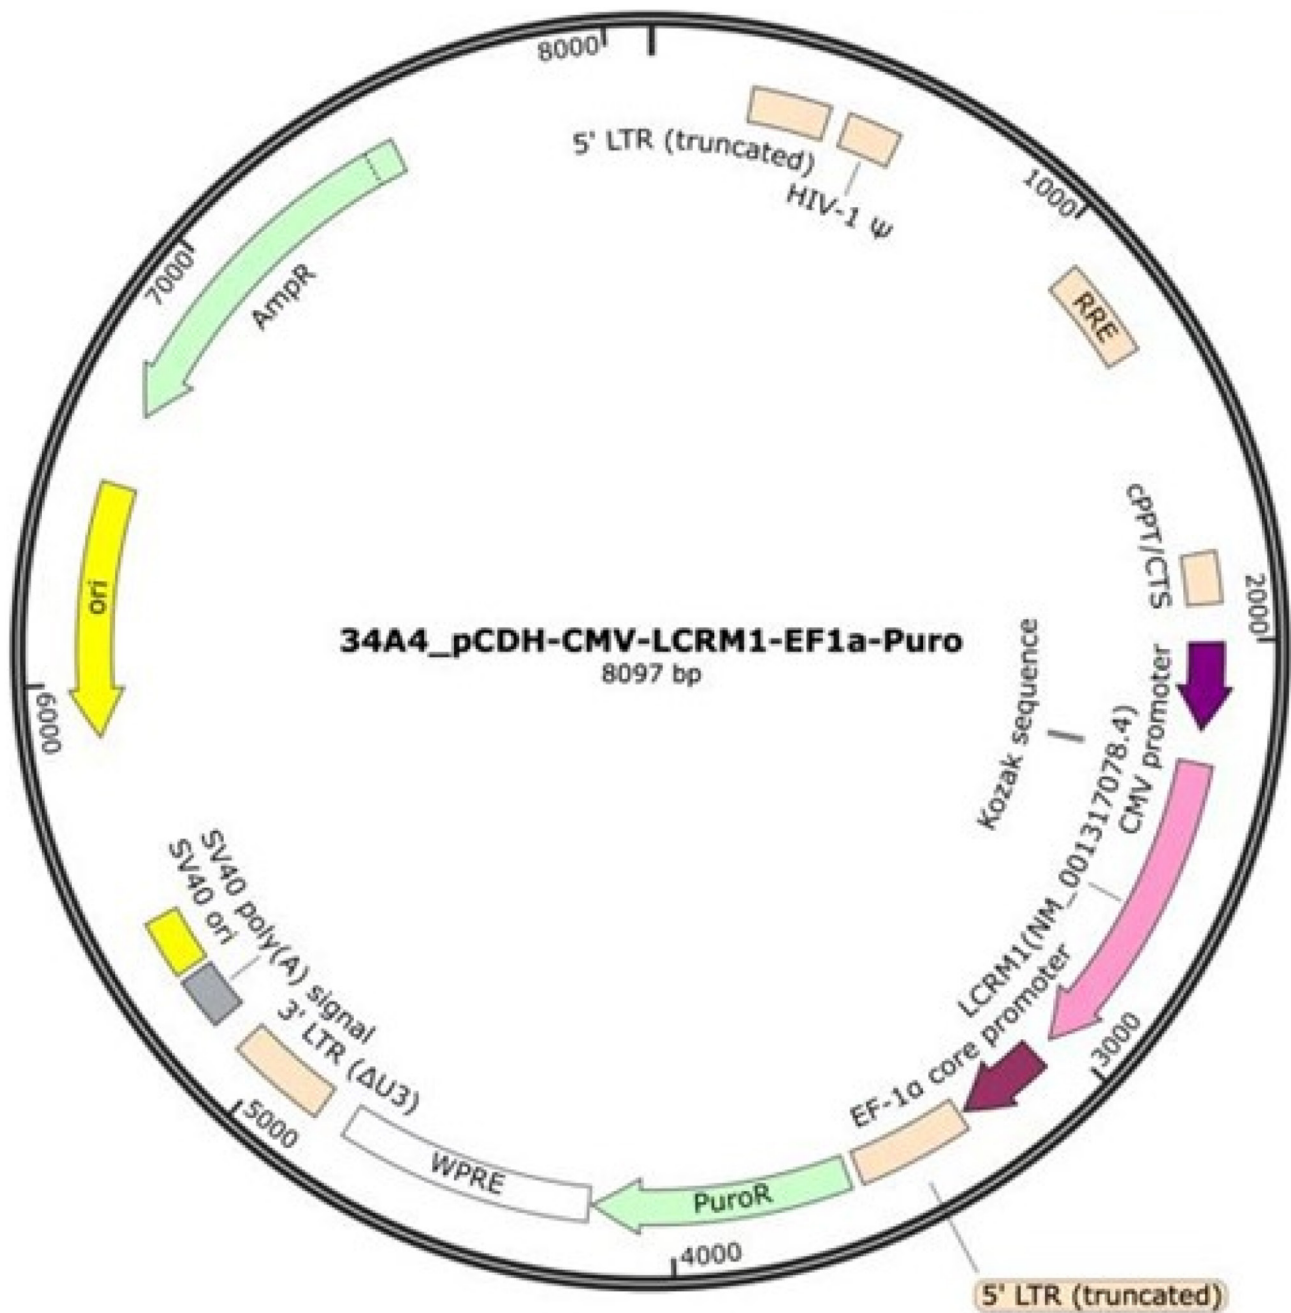

Supplement: Supplementary file 1 [file downloadSupplementary]
